# Supplementary material for: Effectiveness of preoperative medical consultations by internal medicine physicians: a systematic review
Source: PubMed Central journal article supplement — BMJ Open. 2017 Dec 3;7(12):e018632. doi: 10.1136/bmjopen-2017-018632 (PMC5736040; doi:10.1136/bmjopen-2017-018632), 2017-12-03
Supplement: bmjopen-2017-018632supp001.pdf [file bmjopen-2017-018632supp001.pdf]

## Online supplementary material

### Appendix 1. Search Strategies

#### Search strategy for **Centre for Reviews and Dissemination**

- #1 MeSH descriptor: [preoperative care] explode all trees
- #2 MeSH descriptor: [referral and consultation] explode all trees
- #3 (#1 AND #2)

#### Search strategy for **PubMed**

- #1 preoperative[All Fields]
- #2 medical[All Fields]
- #3 ("referral and consultation"[MeSH Terms] OR ("referral"[All Fields] AND "consultation"[All Fields]) OR "referral and consultation"[All Fields] OR "consultation"[All Fields])
- #4 ("surgical procedures, elective"[MeSH Terms] OR ("surgical"[All Fields] AND "procedures"[All Fields] AND "elective"[All Fields]) OR "elective surgical procedures"[All Fields] OR ("elective"[All Fields] AND "surgery"[All Fields]) OR "elective surgery"[All Fields])
- #5 (#1 AND #2 AND #3 AND #4)
- #6 preoperative[Title]
- #7 "medical consultation"[Title]
- #8 (#6 AND #7)
- #9 "preoperative evaluation"[All Fields]
- #10 "internal medicine"[All Fields]
- #11 (#9 AND #10)
- #12 ("Hospitalists"[MeSH] OR "internal medicine"[MeSH]) AND "preoperative evaluation"[All Fields]

#### Search strategy for **EMBASE (Elsevier)**

- #1 'preoperative care'/exp OR 'preoperative care'
- #2 'elective surgery'/exp OR 'elective surgery'
- #3 'referral and consultation'/exp OR 'referral and consultation'
- #4 (#1 AND #2 AND #3)

#### Search strategy for **CINAHL (EBSCO host)**

- S1 MW 'preoperative care'
- S2 MW 'elective surgery'
- S3 MW medical OR MW 'referral and consultation'
- S4 (S1 AND S2 AND S3)

#### Search strategy for **Current Contents Connect (Web of Science)**

- #1 TOPIC: 'preoperative care'
- #2 TOPIC: 'elective surgery'
- #3 TOPIC: 'referral and consultation'
- #4 (#1 AND #2 AND #3)

#### Search strategy for **MEDLINE (Ovid)**

- #1 exp "preoperative care"/

#2 exp "surgical procedures, elective"/

#3 exp "referral and consultation"/

#4 (#1 AND #2 AND #3)
